1 RclA is a thermostable copper (II) reductase required for reactive chlorine resistance  
2 and host colonization in *Escherichia coli*.

3

4 **Rhea M. Derke<sup>1</sup>, Alexander J. Barron<sup>2</sup>, Ivis F. Chaple<sup>3</sup>, Suzanne E. Lapi<sup>3</sup>, Nichole  
5 A. Broderick<sup>2,4</sup>, and Michael J. Gray<sup>1\*</sup>**

6 <sup>1</sup>Department of Microbiology, School of Medicine, University of Alabama at  
7 Birmingham, 845 19th Street South, Birmingham, AL 35294

8 <sup>2</sup>Department of Molecular and Cell Biology, University of Connecticut, Storrs, CT 06269  
9 U.S.A.

10 <sup>3</sup>Department of Radiology, School of Medicine, University of Alabama at Birmingham,  
11 1824 6th Ave South, Birmingham, AL 35233

12 <sup>4</sup>Institute for Systems Genomics, University of Connecticut, Storrs, CT 06296 U.S.A.

13

14 **\* Corresponding Author**

15 Michael J. Gray

16 656 Bevill Biomedical Research Building

17 845 19th Street South

18 Birmingham, AL 35294

19 205-934-6293

20 [mjgray@uab.edu](mailto:mjgray@uab.edu)

21 ORCID iD: 0000-0002-7112-4188

22

23

24 ABSTRACT

25 Inflammatory bowel diseases (IBDs) are a growing health concern and have been linked  
26 to changes in gut microbiome composition. Enterobacteria, including *Escherichia coli*,  
27 bloom to high levels in the gut during inflammation and strongly contribute to the  
28 pathology of IBDs. To survive in the inflamed gut, *E. coli* must tolerate high levels of  
29 antimicrobial compounds produced by the immune system, including toxic metals like  
30 copper and reactive chlorine oxidants such as hypochlorous acid (HOCl). The  
31 mechanisms by which both copper and HOCl kill bacteria are complex and poorly  
32 characterized. In this work, we show that the widely-conserved bacterial HOCl  
33 resistance enzyme RclA catalyzes the reduction of copper (II) to copper (I), and that this  
34 activity specifically protects *E. coli* against toxicity resulting from the combination of  
35 HOCl and intracellular copper, probably by preventing Cu(III) accumulation. Mutant *E.*  
36 *coli* lacking RclA were highly sensitive to killing by HOCl and were defective in  
37 colonizing an animal host. Consistent with the need for RclA to maintain activity under  
38 proteotoxic stress conditions, we found that RclA is remarkably thermostable and  
39 resistant to inactivation by HOCl. Our results indicate new complexity in the interactions  
40 between antimicrobial toxins produced by innate immune cells, and highlight that  
41 understanding copper redox reactions both inside and outside of cells is critical to our  
42 understanding of how bacteria evade innate immune factors during inflammation.

43

44 **Keywords:** RclA, bacterial stress response, HOCl, copper, inflammation, *E. coli*

45

46 SIGNIFICANCE STATEMENT

47 During infection and inflammation, the innate immune system uses antimicrobial  
48 compounds to control bacterial populations. These include toxic metals like copper and  
49 reactive oxidants, including reactive chlorine species like hypochlorous acid (HOCl). We  
50 have now found that RclA, an enzyme strongly induced by HOCl in pro-inflammatory  
51 *Escherichia coli* and found in many bacteria inhabiting epithelial surfaces, reduces  
52 copper (II) to copper (I), and that this activity is required to resist killing by HOCl and for  
53 host colonization. This finding indicates that copper redox chemistry plays a critical and  
54 previously unappreciated role in bacterial interactions with the innate immune system.  
55

56 INTRODUCTION

57 Inflammatory bowel diseases (IBDs), like Crohn's disease and ulcerative colitis,  
58 are a growing health problem (1), and are associated with dramatic changes in the  
59 composition of the gut microbiome (2-6). Patients with IBDs have increased proportions  
60 of proteobacteria, especially *Escherichia coli* and other *Enterobacteriaceae*, in their gut  
61 microbiomes, which is thought to contribute to the progression of disease (7-10). The  
62 bloom of enterobacteria in the inflamed gut is driven by increased availability of  
63 respiratory terminal electron acceptors (e.g. oxygen, nitrate, TMAO) and carbon sources  
64 (e.g. ethanolamine, mucin), which *E. coli* and other facultative anaerobes can use to  
65 outcompete the obligate anaerobes (*Bacteroides* and *Clostridia*) that dominate a healthy  
66 gut microbiome (2, 3) In addition to these nutritional changes in the gut environment,  
67 inflammation leads to increased production of antimicrobial compounds by the innate  
68 immune system (9-11), which also impact the bacterial community in the gut. These

69 include antimicrobial peptides, toxic metals (e.g. copper), reactive oxygen species  
70 (ROS), reactive nitrogen species (RNS), and reactive chlorine species (RCS) (3, 12,  
71 13). Since bacteria living in an inflamed gut are exposed to substantially increased  
72 levels of these toxins, the differential survival of proteobacteria during long-term  
73 inflammation suggests that *E. coli* may have evolved better mechanisms to resist these  
74 stresses than other types of commensal bacteria.

75         RCS are highly reactive oxidants produced by neutrophils and are potent  
76 antibacterial compounds (14, 15) that have been reported to play a role in controlling  
77 intestinal bacterial populations (16-18). The RCS response of *E. coli* is complex and  
78 incompletely understood (15, 19-22), but characteristically involves repair of damaged  
79 cellular components, often proteins (15). Protein-stabilizing chaperones are upregulated  
80 during RCS stress, including Hsp33 (23, 24) and inorganic polyphosphate (22, 25, 26),  
81 and enzymes are expressed that repair oxidized proteins, including periplasmic  
82 methionine sulfoxide reductase (MsrPQ) (27) and the chaperedoxin CnoX (28). *E. coli*  
83 has multiple HOCl-sensing regulators, including YedVW (which regulates MsrPQ) (27),  
84 NemR (regulator of NemaA and GloA, which detoxify reactive aldehydes) (19), HypT  
85 (which regulates cysteine, methionine, and iron metabolism) (21), and RclR, the RCS-  
86 specific activator of the *rcIABC* operon (20).

87         Innate immune cells also use copper as an antimicrobial agent and copper levels  
88 rise in inflamed tissues, although the exact mechanism(s) by which copper kills bacteria  
89 are not yet fully understood (29-31). HOCl-stressed *E. coli* down-regulate genes  
90 encoding iron import systems (e.g. *fepABCD*, *fhuACDF*) and upregulate genes for zinc

91 and copper resistance (e.g. *copA*, *cueO*, *cusC*, *zntA*, *zupT*) (19), suggesting metals may  
92 play some role in RCS resistance.

93 The predicted flavin-dependent oxidoreductase RclA of *E. coli* is strongly  
94 upregulated in the presence of RCS (20, 32), protects against killing by HOCl via a  
95 previously unknown mechanism (20), and is widely conserved among bacteria found on  
96 epithelial surfaces. In this work, we have now determined that RclA is a thermostable,  
97 HOCl-resistant copper (II) reductase that is required for efficient colonization of an  
98 animal host and protects *E. coli* specifically against the combination of HOCl and  
99 intracellular copper, probably by preventing the formation of highly reactive Cu(III). We  
100 also found that, surprisingly, extracellular copper effectively protects bacteria against  
101 killing by HOCl in cell culture, most likely by catalyzing the breakdown of HOCl in the  
102 media before it reaches the bacterial cells.

103

## 104 RESULTS

105 **RclA is conserved among bacterial inhabitants of epithelial surfaces.** In *E. coli*, the  
106 expression of the *rcl* operon (*rclA*, *rclB*, and *rclC*) is controlled by the RCS specific  
107 transcriptional activator RclR (20). RclA is the most phylogenetically conserved protein  
108 of the Rcl system (Figure 1) and is found almost exclusively in bacteria known to  
109 colonize epithelial surfaces (SI Dataset S1), suggesting that it may play an important  
110 role in host-microbe interactions in many species. Bacteria encoding RclA homologs  
111 include Gram negative species (e.g. *Salmonella enterica*), Gram positive species (e.g.  
112 *Streptococcus sanguinis*), obligate anaerobes (e.g. *Clostridium perfringens*), facultative  
113 anaerobes (e.g. *Staphylococcus aureus*), pathogens (e.g. *Enterococcus faecalis*),

114 commensals (e.g. *Bacteroides thetaiotaomicron*), and probiotics (e.g. *Lactobacillus*  
115 *reuteri*), suggesting that RclA's function is broadly conserved and not specific to a single  
116 niche or type of host-microbe interaction. RclR, RclB, and RclC are much less widely  
117 conserved, and are found only in certain species of proteobacteria, primarily members  
118 of the *Enterobacteriaceae*.

119

120 **RclA contributes to HOCl resistance and host colonization.** An *rclA* mutant of *E.*  
121 *coli* is more susceptible to HOCl-mediated killing than the wild-type (20). In this work,  
122 we utilized a growth curve-based method to measure sensitivity to sub-lethal HOCl  
123 stress by quantifying changes in lag phase extension (LPE) of cultures grown in the  
124 presence of HOCl. Using this method, we observed significant increases in LPE for a  
125  $\Delta rclA$  mutant strain compared to the wild type grown in the presence of various  
126 concentrations of HOCl (Supplemental Figure 1). This confirms previous results and  
127 validates the importance of RclA for resisting HOCl-mediated oxidative stress in *E. coli*.  
128 To directly test the role of RclA in interactions with an animal host, we examined the  
129 ability of *E. coli* to colonize the intestine of *Drosophila melanogaster*, where the  
130 presence of enterobacteria is known to stimulate antimicrobial HOCl production by the  
131 dual oxidase Duox (16, 18). Since an *E. coli* K-12 strain did not efficiently colonize *D.*  
132 *melanogaster* (Supplemental Figure 2), we used the colonization-proficient *E. coli* strain  
133 Nissle 1917 (33, 34) in these experiments (Figure 2). *E. coli* Nissle 1917  $\Delta rclA$  mutants  
134 had a significant defect in their ability to colonize *Drosophila* (Figure 2), which was  
135 largely eliminated at the early timepoints of colonization when host Duox expression

136 was reduced with RNAi. This shows that RclA's contribution to *E. coli* HOCl resistance  
137 is important for efficient host colonization.

138

139 **RclA reduces copper (II) to copper (I).** Although the role of RclA in protection from  
140 RCS has been appreciated, the physiological function of RclA was unknown. Based on  
141 its homology to other flavin-dependent disulfide oxidoreductases (35), we hypothesized  
142 that RclA catalyzed the reduction of an unknown cellular component oxidized by RCS.  
143 RclA is homologous to mercuric reductase (MerA), an enzyme that reduces Hg(II) to  
144 Hg(0) (36) (Figure 3 and Supplemental Figure 3). HOCl is capable of oxidizing transition  
145 metals, including iron (37, 38) and manganese (39, 40). Although RclA and MerA share  
146 a conserved CXXXXC active site (Figure 3), MerA has an extra N-terminal domain and  
147 two additional conserved cysteine pairs for metal binding. RclA only has one conserved  
148 cysteine pair (Figure 3 and Supplemental Figure 3), indicating that, if its substrate is a  
149 metal, it must have a different metal-binding mechanism than MerA. We measured the  
150 specific activity (SA) of RclA in the presence of a panel of biologically relevant metals.  
151 We did not test mercury, since under normal conditions we do not expect *E. coli* to  
152 encounter this metal in its environment. In the absence of any metal, RclA slowly  
153 oxidized NADH ( $0.0303 \mu\text{mole NAD}^+ \text{min}^{-1} \text{mg}^{-1} \text{RclA}$ ), consistent with the background  
154 activity of other flavin-dependent oxidoreductases in the absence of their specific  
155 substrates (41, 42). Two of the metals we tested significantly affected RclA SA, as  
156 measured by NADH oxidation. Copper greatly increased the SA of RclA, while zinc  
157 caused a decrease in SA (Figure 4A). These results suggested that copper was a  
158 substrate of RclA, and that zinc may inhibit RclA activity.

159            Since RclA is an NADH oxidase, the results shown in Figure 4A strongly  
160 suggested that this enzyme was concurrently reducing copper. Copper exists in four  
161 possible oxidation states, Cu(I), Cu(II), and the less common and highly reactive Cu(III)  
162 and Cu(IV) states (43). The copper salt used in our RclA SA determinations was CuCl<sub>2</sub>,  
163 suggesting that RclA was reducing this Cu(II) species to Cu(I). This was very surprising,  
164 since Cu(I) is generally thought of as a toxic species that causes oxidative stress (44,  
165 45), so it was not obvious either why *E. coli* would produce Cu(I) during RCS stress or  
166 why production of Cu(I) might be protective. We therefore first sought to validate that  
167 RclA was in fact reducing Cu(II) to Cu(I) while oxidizing NADH to NAD<sup>+</sup>. We measured  
168 Cu(I) accumulation in RclA reactions directly using the Cu(I)-specific chelator  
169 bathocuproinedisulfonic acid (BCS) (46). NADH spontaneously reduces Cu(II) (47) at  
170 rates too slow to impact the measurements made here, but BCS increases the rate of  
171 this non-enzymatic copper reduction by shifting the equilibrium of the reaction towards  
172 Cu(I) (48). Stopping RclA reactions with a mixture of BCS and EDTA, to chelate any  
173 remaining Cu(II), allowed us to observe RclA-dependent Cu(I) accumulation  
174 (Supplemental Figure 4). We observed a significant increase in BCS/Cu(I) complex  
175 formation only in reactions containing RclA, NADH, and Cu(II), and not in reactions  
176 lacking any single component (Figure 4B, Supplemental Figure 4). Taken together,  
177 these findings show that RclA has Cu(II) reductase activity and generates Cu(I) as a  
178 product.

179

180 **How does Cu(II) reductase protect *E. coli* against HOCl?** Both HOCl and copper  
181 cause oxidative stress in bacteria and Cu(I) is generally considered more toxic than



182 Cu(II) (15, 29, 49-52), so we were surprised that a Cu(II) reductase protected *E. coli*  
183 against HOCl. Copper reacts with the ROS hydrogen peroxide (H<sub>2</sub>O<sub>2</sub>) to form highly  
184 reactive hydroxyl radicals (31, 45, 53, 54), but how the presence of copper influences  
185 bacterial sensitivity to RCS has not been investigated before this study. The chemistry  
186 of reactions between HOCl and copper is complicated. HOCl can oxidize Cu(II) to highly  
187 reactive Cu(III) (55-59) and both Cu(I) and Cu(II) are known to catalyze the breakdown  
188 of HOCl (55-58). At near-neutral pH, similar to that in the large intestine or bacterial  
189 cytoplasm, Cu(I) accelerates the decomposition of HOCl to O<sub>2</sub> and chloride ions by as  
190 much as 10<sup>8</sup>-fold (56).

191 We envisioned three possible mechanisms that might explain how Cu(II)  
192 reduction to Cu(I) by RclA could protect bacteria against HOCl. First, since the copper  
193 exporters of *E. coli* (CopA and CusCFBA) are upregulated by HOCl treatment (19) and  
194 only transport Cu(I) (44, 60-62), it is possible that RclA facilitates the rapid export of  
195 cytoplasmic copper, allowing it to react with and eliminate HOCl outside the cell.  
196 Secondly, RclA might facilitate an HOCl-degrading Cu(I) / Cu(II) redox cycle in the  
197 cytoplasm. Thirdly, RclA-catalyzed reduction of Cu(II) to Cu(I) might limit the production  
198 of Cu(III) in the cytoplasm. Cu(III) is a known product of the reaction between HOCl and  
199 Cu(II) (55-58), and is a highly reactive oxidant (59), with the potential to react with and  
200 damage almost any cellular component. Uncontrolled production of Cu(III) could greatly  
201 potentiate the ability of HOCl to kill bacterial cells.

202

203 **Extracellular CuCl<sub>2</sub> protects both wild-type and  $\Delta$ rclA *E. coli* against HOCl.** To

204 distinguish between the above models, we first used growth curves in the presence of

205 copper and HOCl to identify how combinations of HOCl and copper influenced LPE of  
206 wild type and  $\Delta rcIA$  mutant *E. coli* (Figure 5). Consistent with the ability of Cu to  
207 decompose HOCl to non-toxic O<sub>2</sub> and Cl<sup>-</sup> (55-58), addition of copper to HOCl-containing  
208 media greatly decreased LPE for both the wild type and the *rcIA* null mutant (Figure 5),  
209 indicating that the presence of exogenous copper strongly protected *E. coli* against  
210 HOCl. Copper being uniformly protective between the two strains makes it likely that  
211 extracellular copper had reacted with and detoxified the HOCl before cells were  
212 inoculated into the media.

213

214 **RcIA does not protect against HOCl by facilitating copper export.** To test whether  
215 the Cu(II) reductase activity of RcIA is important for exporting copper during HOCl  
216 stress, we measured intracellular copper concentrations before and after HOCl stress.  
217 We found that the *rcIA* mutant contained, on average, more intracellular copper before  
218 HOCl stress than the wild-type but that both strains contained similar amounts of copper  
219 after HOCl stress (Supplemental Figure 5). This indicates that although RcIA may affect  
220 basal copper homeostasis, it does not facilitate copper export during HOCl stress.

221

222 **RcIA protects *E. coli* against the combination of HOCl and intracellular copper.**

223 Next, we aimed to investigate how intracellular copper affects the HOCl resistance of *E*  
224 *coli*. To address this, we grew wild type and  $\Delta rcIA$  mutant *E. coli* overnight in minimal  
225 media with and without copper before inoculating the strains into copper-free media to  
226 perform HOCl-stress growth curves. If RcIA's primary function was to drive cytoplasmic  
227 HOCl decomposition, then the presence of intracellular copper would be expected to

228 protect wild-type *E. coli* against HOCl, and growth under copper-free conditions would  
229 be expected to increase the sensitivity of the wild-type to match that of the  $\Delta rclA$  mutant.  
230 However, we actually observed that LPE extension after HOCl stress of the  $\Delta rclA$   
231 mutant was decreased to that of wild-type when grown and stressed in copper-free  
232 media (Figure 5). The decreased sensitivity of the  $\Delta rclA$  mutant when intracellular  
233 copper is limited suggests that the physiological role of RclA is to resist the stress  
234 resulting from the combination of HOCl and copper in the cytoplasm. The combination  
235 of copper and HOCl is known to generate strong oxidizing intermediates, most notably  
236 Cu(III) (55-59). Our data demonstrate that intracellular copper potentiates killing by  
237 HOCl, and that RclA's Cu(II) reductase activity counteracts this effect.

238

239 **RclA is thermostable and resistant to denaturation by HOCl and urea.** We

240 hypothesized that the copper reductase activity of RclA was likely to be relatively stable  
241 under denaturing conditions because it must remain active during exposure to HOCl  
242 stress, which is known to cause extensive protein misfolding and aggregation *in vivo*  
243 (15, 21, 22, 26-28). To test this hypothesis, we first measured RclA activity after  
244 treatment with protein denaturing agents (HOCl and urea) *in vitro*. HOCl treatment (with  
245 0, 5, 10, and 20-fold molar ratios of HOCl to RclA) was done on ice for 30 minutes and  
246 urea treatment (0, 2, 4, and 6 M) was carried out at room temperature for 24 hours.  
247 RclA retained full copper reductase activity at all HOCl levels tested, indicating that it is  
248 highly resistant to treatment with HOCl (Figure 6A). By comparison, lactate  
249 dehydrogenase had significantly decreased activity after treatment with a 5-fold excess  
250 of HOCl (Figure 6B). RclA also retained 35.8% of full activity after being equilibrated in 6

251 M urea (Figure 6C). Finally, we used circular dichroism (CD) spectroscopy to measure  
252 the melting temperature ( $T_m$ ) of RclA, which was 65 °C (Figure 6D, Supplemental Figure  
253 6), indicating that RclA is thermostable relative to the rest of the *E. coli* proteome, which  
254 has an average  $T_m$  of approximately 55 °C (56, 63).

255

## 256 DISCUSSION

257         The antimicrobial function of copper in host-microbe interactions is well-  
258 established (29, 31, 49, 50), although the exact mechanism(s) by which copper kills  
259 bacteria remain incompletely known (52, 53). In this work, we identified a new way in  
260 which copper toxicity contributes to host-bacteria interactions via its reactions with RCS.  
261 We identified RclA as a highly stable Cu(II) reductase (Figure 4) required for resisting  
262 killing by the combination of HOCl and intracellular copper in *E. coli* (Figure 5). In the  
263 absence of *rclA*, *E. coli* had a significant defect in host colonization which was partially  
264 eliminated when production of HOCl by the host was reduced (Figure 2). Duox  
265 activation and HOCl production are rapid host responses that occur at early stages of  
266 bacterial colonization of the gut, in agreement with our data showing that RclA is  
267 important for initial establishment. As the course of infection progresses, additional  
268 antimicrobial effectors, such as antimicrobial peptides regulated by NF- $\kappa$ B signaling,  
269 become more prominent (27), which could explain the similar colonization levels of  
270 mutant and wild-type strains at later time points. The amount of copper in bacterial cells  
271 is low (29, 30), but how much is unbound by protein and its redox state under different  
272 conditions are unknown (29). Given the broad conservation of RclA among host-

273 associated microbes, there is likely to be a common and previously unsuspected role for  
274 copper redox reactions in interactions between bacteria and the innate immune system.

275         Copper accumulates in host tissues during inflammation (64, 65), as do RCS (66,  
276 67). Our discovery that even very low concentrations of extracellular copper can protect  
277 bacteria against RCS adds a new and important facet to understanding copper's role in  
278 innate immunity. Since a large proportion of host tissue damage during inflammation is  
279 due to HOCl (68, 69), the presence of copper in inflamed tissues may play an important  
280 role not only in killing bacteria, but potentially in protecting host cells, although this  
281 hypothesis will require further testing. Our results also show that media copper  
282 concentrations are a key variable in experiments testing the sensitivity of cells to HOCl,  
283 and that care must be taken to account for media copper content and use metal-free  
284 culture vessels in such experiments.

285         While RclA itself is widely conserved, the *rclABCR* locus as a whole is restricted  
286 to certain enteric proteobacteria, including *E. coli*, *Salmonella*, *Citrobacter*, *Raoultella*,  
287 *Serratia* and *Shigella*. These genera are notable for their close association with gut  
288 inflammation and the ability of pathogenic strains to bloom to very high levels in the gut  
289 in disease states (2, 3, 7-10, 70, 71). We hypothesize that the ability to survive  
290 increased levels of antimicrobial compounds (including RCS) in the inflamed gut is  
291 important for the ability of enterobacteria to exploit this niche, and our *in vivo* results  
292 with the  $\Delta rclA$  mutant support this idea (Figure 2). We do not currently know the  
293 physiological roles of RclB, which is a small predicted periplasmic protein, or RclC,  
294 which is a predicted inner membrane protein, although deletion of either of these genes  
295 results in increased HOCl sensitivity in *E. coli* (20). We hypothesize that they may

296 support the copper-dependent activity of RclA, and are currently pursuing experiments  
297 to test this idea.

298

## 299 EXPERIMENTAL PROCEDURES

300 Detailed experimental procedures are described in the *SI Appendix*.

301

302 **Protein expression and purification.** Twin-strep tagged RclA was expressed in M9  
303 minimal media (72) containing 2 g l<sup>-1</sup> glucose and 100 µg ml<sup>-1</sup> ampicillin at 20 °C.

304 Recombinant RclA was purified using a 1 mL StrepTrap HP column (GE, 28-9136-30  
305 AC) according to the manufacturer's instructions.

306

307 **Colonization of *D. melanogaster* with *E. coli* Nissle 1917.** Canton-S *D. melanogaster*  
308 were used as a wild-type line. Duox-RNAi *D. melanogaster* were obtained from crosses  
309 of *UAS-dDuox-RNAi* (17) with *NP1-GAL4* (enterocyte - specific driver). Adult female *D.*  
310 *melanogaster* were starved for 2h at 29°C prior to being fed a 1:1 suspension of  
311 bacteria (OD<sub>600</sub> = 200) and 2.5% sucrose applied to a filter paper disk on the surface of  
312 normal fly food. *D. melanogaster* were sterilized and rinsed in sterile PBS before being  
313 homogenized in screw-top bead tubes with PBS. *E. coli* colonies were identified by  
314 morphology and counted.

315

316 **NADH oxidase activity.** RclA activity was assayed in 20 mM HEPES, 100 mM NaCl,  
317 pH 7 by measuring NADH oxidation over time. Reactions were started by adding 100 µL

318 of NADH (200  $\mu\text{M}$  final) with the indicated metal salts (200  $\mu\text{M}$  final) to RclA (3  $\mu\text{M}$  final)  
319 at 37 °C. NADH was quantified spectrophotometrically ( $\epsilon_{340} = 6300 \text{ M}^{-1} \text{ cm}^{-1}$ ).

320

321 **Copper (I) quantification.** Cu(I) accumulation after the course of the RclA reaction was  
322 measured using bathocuproinedisulfonic acid disodium salt (BCS, Sigma Aldrich  
323 B1125). NADH oxidation reactions were carried out as in the previous section. Each  
324 reaction was stopped at 5 minutes with a BCS (400  $\mu\text{M}$  final) and EDTA (1 mM final)  
325 solution. The absorbance of the BCS/Cu(I) complex was measured at 483 nm every  
326 minute for five minutes to ensure complete saturation of the BCS, after which BCS/Cu(I)  
327 was quantified spectrophotometrically ( $\epsilon_{483} = 13,000 \text{ M}^{-1} \text{ cm}^{-1}$ ) (46).

328

329 **Measuring sensitivity to HOCl in vivo.** Copper-free MOPS was prepared by treating  
330 MOPS minimal media (Teknova) containing 2 g l<sup>-1</sup> glucose and 1.32 mM K<sub>2</sub>HPO<sub>4</sub> with  
331 Chelex 100 (Bio-Rad), then adding back the metals normally present in MOPS except  
332 for copper. Overnight cultures were normalized to  $A_{600} = 0.02$  in copper-free MOPS with  
333 the indicated concentrations of HOCl and CuCl<sub>2</sub>. Cultures were incubated with shaking  
334 at 37 °, measuring  $A_{600}$  every 30 minutes for 27 hours. Sensitivity was determined by  
335 comparing lag phase extensions (LPE; difference in hours to reach  $A_{600} \geq 0.15$  from the  
336 no HOCl treatment control under the same CuCl<sub>2</sub> condition) for each stress condition.

337

338 **Measuring intracellular copper after HOCl stress.** Trace metal analysis was  
339 performed using inductively coupled plasma mass spectroscopy (ICP-MS, Agilent  
340 Technologies 7700x ICP-MS, Santa Clara, CA, USA). Wild-type and  $\Delta rclA$  *E. coli* were

341 grown to  $A_{600} = 0.6$  in MOPS and stressed with 400  $\mu\text{M}$  HOCl for 30 mins at 37 °C with  
342 shaking. Each sample was pelleted and rinsed three times with PBS before being  
343 suspended in concentrated nitric acid. Samples were diluted to 2% nitric acid and  
344 filtered before ICP-MS analysis. Copper concentrations were determined by comparison  
345 to a standard curve using Agilent software (ICP-MS MassHunter v4.3) and normalized  
346 to cell mass (wet weight).

347

348 ***NADH oxidase activity after treatment with urea and HOCl.*** RclA (3  $\mu\text{M}$ ) was  
349 equilibrated for 24 hours at room temperature with increasing concentrations of urea (0,  
350 2, 4, and 6 M) in 20 mM HEPES, 100 mM NaCl, pH 7. HOCl treatment was done by  
351 mixing increasing molar ratios of HOCl (0, 5, 10, and 20-fold excess) with 35  $\mu\text{M}$  RclA or  
352 L-lactate dehydrogenase (LDH) (Sigma-Aldrich) in 50 mM sodium phosphate, pH 6.8,  
353 150 mM NaCl and incubating on ice for 30 minutes. LDH reactions were performed  
354 under the same conditions as the RclA reactions but contained no copper and were  
355 started with 1.2 mM NADH and 1.2 mM pyruvate.

356

357 ***Melting temperature determination.*** CD spectra were collected on purified RclA in 20  
358 mM HEPES, 100 mM NaCl, pH 7.5. Thermal CD data between 30 °C and 90 °C were  
359 obtained in standard 1.0 mm quartz cells. Data were baseline corrected against the  
360 appropriate buffer solution and smoothed with Jasco software.

361

362 ***Data analysis and bioinformatics.*** All statistical analyses were performed using  
363 GraphPad Prism (version 7.0a). RclA conservation tree was made from amino acid



364 sequence alignments using MUSCLE of RclA (BLAST e value <  $1 \times 10^{-90}$  in 284 species),  
365 RclB (BLAST e value <  $1 \times 10^{-1}$  in 61 species), RclC, (BLAST e value <  $1 \times 10^{-80}$  in 49  
366 species), and RclR (BLAST e value <  $1 \times 10^{-40}$  in 43 species). BLAST searches were  
367 done by comparing to each respective protein in *E. coli* MG1655. Tree graphic was  
368 made using the interactive tree of life (73). Active site alignment of *E. coli* RclA  
369 (ADC80840.1) and MerA amino acid sequences from seven bacterial species was  
370 made using CLUSTAL O (1.2.4) and graphic was made with WEBLOGO  
371 ([weblogo.berkeley.edu/logo.cgi](http://weblogo.berkeley.edu/logo.cgi)). Full length alignment of *E. coli* RclA (ADC80840.1)  
372 and MerA (ADC80840.1), conservation scoring, and graphic were made using  
373 PRALINE.

374

#### 375 ACKNOWLEDGEMENTS

376 Thanks to Dr. Peter Prevelige (UAB Department of Microbiology) for helpful  
377 discussions, Emily Schwessinger for preliminary characterization of RclA, Dr. Michael  
378 Jablonsky (UAB Chemistry Department) for assistance with CD spectra acquisition, and  
379 Dr. Won-Jae Lee (Seoul National University) for providing the *D. melanogaster* Duox  
380 RNAi line. This project was supported by University of Alabama at Birmingham  
381 Department of Microbiology startup funds and NIH grant R35GM124590 (to M.J.G) and  
382 startup funds and NIH grant R35GM128871 (to N.A.B.).

383

#### 384 CONFLICTS OF INTEREST

385 The authors have no conflicts of interest to declare.

386

387 AUTHOR CONTRIBUTIONS

388 R.M.D., A.J.B., and I.F.C. performed research, and R.M.D., A.J.B, S.E.L., N.A.B, and  
389 M.J.G. contributed to designing research, analyzing data, and writing the paper.

390

391 REFERENCES

- 392 1. Kaplan GG (2015) The global burden of IBD: from 2015 to 2025. *Nat Rev*  
393 *Gastroenterol Hepatol* 12(12):720-727.
- 394 2. Litvak Y, Byndloss MX, Tsolis RM, & Baumler AJ (2017) Dysbiotic Proteobacteria  
395 expansion: a microbial signature of epithelial dysfunction. *Curr Opin Microbiol*  
396 39:1-6.
- 397 3. Stecher B (2015) The Roles of Inflammation, Nutrient Availability and the  
398 Commensal Microbiota in Enteric Pathogen Infection. *Microbiol Spectr* 3(3).
- 399 4. Manichanh C, Borrueal N, Casellas F, & Guarner F (2012) The gut microbiota in  
400 IBD. *Nat Rev Gastroenterol Hepatol* 9(10):599-608.
- 401 5. Casen C, *et al.* (2015) Deviations in human gut microbiota: a novel diagnostic  
402 test for determining dysbiosis in patients with IBS or IBD. *Aliment Pharmacol*  
403 *Ther* 42(1):71-83.
- 404 6. Dickson I (2017) Gut microbiota: Diagnosing IBD with the gut microbiome. *Nat*  
405 *Rev Gastroenterol Hepatol* 14(4):195.
- 406 7. Litvak Y, *et al.* (2019) Commensal Enterobacteriaceae Protect against  
407 Salmonella Colonization through Oxygen Competition. *Cell Host Microbe*  
408 25(1):128-139 e125.

- 409 8. Zhu W, *et al.* (2018) Precision editing of the gut microbiota ameliorates colitis.  
410 *Nature* 553(7687):208-211.
- 411 9. Lupp C, *et al.* (2007) Host-mediated inflammation disrupts the intestinal  
412 microbiota and promotes the overgrowth of Enterobacteriaceae. *Cell Host*  
413 *Microbe* 2(2):119-129.
- 414 10. Winter SE, Lopez CA, & Baumler AJ (2013) The dynamics of gut-associated  
415 microbial communities during inflammation. *EMBO Rep* 14(4):319-327.
- 416 11. Park JH, Peyrin-Biroulet L, Eisenhut M, & Shin JI (2017) IBD  
417 immunopathogenesis: A comprehensive review of inflammatory molecules.  
418 *Autoimmun Rev* 16(4):416-426.
- 419 12. Chami B, Martin NJJ, Dennis JM, & Witting PK (2018) Myeloperoxidase in the  
420 inflamed colon: A novel target for treating inflammatory bowel disease. *Arch*  
421 *Biochem Biophys* 645:61-71.
- 422 13. Pavlick KP, *et al.* (2002) Role of reactive metabolites of oxygen and nitrogen in  
423 inflammatory bowel disease. *Free Radic Biol Med* 33(3):311-322.
- 424 14. Winterbourn CC & Kettle AJ (2013) Redox reactions and microbial killing in the  
425 neutrophil phagosome. *Antioxid Redox Signal* 18(6):642-660.
- 426 15. Gray MJ, Wholey WY, & Jakob U (2013) Bacterial responses to reactive chlorine  
427 species. *Annu Rev Microbiol* 67:141-160.
- 428 16. Kim SH & Lee WJ (2014) Role of DUOX in gut inflammation: lessons from  
429 *Drosophila* model of gut-microbiota interactions. *Front Cell Infect Microbiol* 3:116.
- 430 17. Ha EM, Oh CT, Bae YS, & Lee WJ (2005) A direct role for dual oxidase in  
431 *Drosophila* gut immunity. *Science* 310(5749):847-850.

- 432 18. Lee KA, *et al.* (2013) Bacterial-derived uracil as a modulator of mucosal immunity  
433 and gut-microbe homeostasis in *Drosophila*. *Cell* 153(4):797-811.
- 434 19. Gray MJ, Wholey WY, Parker BW, Kim M, & Jakob U (2013) NemR is a bleach-  
435 sensing transcription factor. *J Biol Chem* 288(19):13789-13798.
- 436 20. Parker BW, Schwessinger EA, Jakob U, & Gray MJ (2013) The RclR protein is a  
437 reactive chlorine-specific transcription factor in *Escherichia coli*. *J Biol Chem*  
438 288(45):32574-32584.
- 439 21. Drazic A, *et al.* (2013) Methionine oxidation activates a transcription factor in  
440 response to oxidative stress. *Proc Natl Acad Sci U S A* 110(23):9493-9498.
- 441 22. Gray MJ, *et al.* (2014) Polyphosphate is a primordial chaperone. *Mol Cell*  
442 53(5):689-699.
- 443 23. Dahl JU, Gray MJ, & Jakob U (2015) Protein quality control under oxidative  
444 stress conditions. *J Mol Biol* 427(7):1549-1563.
- 445 24. Winter J, Ilbert M, Graf PC, Ozcelik D, & Jakob U (2008) Bleach activates a  
446 redox-regulated chaperone by oxidative protein unfolding. *Cell* 135(4):691-701.
- 447 25. Yoo NG, *et al.* (2018) Polyphosphate Stabilizes Protein Unfolding Intermediates  
448 as Soluble Amyloid-like Oligomers. *J Mol Biol* 430(21):4195-4208.
- 449 26. Gray MJ & Jakob U (2015) Oxidative stress protection by polyphosphate--new  
450 roles for an old player. *Curr Opin Microbiol* 24:1-6.
- 451 27. Gennaris A, *et al.* (2015) Repairing oxidized proteins in the bacterial envelope  
452 using respiratory chain electrons. *Nature* 528(7582):409-412.

- 453 28. Goemans CV, Vertommen D, Agrebi R, & Collet JF (2018) CnoX Is a  
454 Chaperedoxin: A Holdase that Protects Its Substrates from Irreversible Oxidation.  
455 *Mol Cell* 70(4):614-627 e617.
- 456 29. Braymer JJ & Giedroc DP (2014) Recent developments in copper and zinc  
457 homeostasis in bacterial pathogens. *Curr Opin Chem Biol* 19:59-66.
- 458 30. Sheldo JR & Skaar EP (2019) Metals as phagocyte antimicrobial effectors.  
459 *Current Opinion in Immunology* 60:1 - 9.
- 460 31. Besold AN, Culbertson EM, & Culotta VC (2016) The Yin and Yang of copper  
461 during infection. *J Biol Inorg Chem* 21(2):137-144.
- 462 32. Wang S, *et al.* (2009) Transcriptomic response of Escherichia coli O157:H7 to  
463 oxidative stress. *Appl Environ Microbiol* 75(19):6110-6123.
- 464 33. Grozdanov L, *et al.* (2004) Analysis of the genome structure of the  
465 nonpathogenic probiotic Escherichia coli strain Nissle 1917. *J Bacteriol*  
466 186(16):5432-5441.
- 467 34. Wassenaar TM (2016) Insights from 100 Years of Research with Probiotic E.  
468 Coli. *Eur J Microbiol Immunol (Bp)* 6(3):147-161.
- 469 35. Macheroux P, Kappes B, & Ealick SE (2011) Flavogenomics--a genomic and  
470 structural view of flavin-dependent proteins. *FEBS J* 278(15):2625-2634.
- 471 36. Lian P, *et al.* (2014) X-ray structure of a Hg<sup>2+</sup> complex of mercuric reductase  
472 (MerA) and quantum mechanical/molecular mechanical study of Hg<sup>2+</sup> transfer  
473 between the C-terminal and buried catalytic site cysteine pairs. *Biochemistry*  
474 53(46):7211-7222.

- 475 37. Lisa K. Folkes LPC, 1 and Peter Wardman (1995) Kinetics and Mechanisms of  
476 Hypochlorous Acid Reactions. *ARCHIVES OF BIOCHEMISTRY AND*  
477 *BIOPHYSICS* 323(1):120-126.
- 478 38. Conocchioli TJ, Jr. EJH, & Sutin N (1965) The Formation of Iron(IV) in the  
479 Oxidation of Iron(II). *J. Am. Chem. Soc.* 87 87(4):926 – 927.
- 480 39. Hao OJ, Davis AP, & Chang PH (1991) Kinetics of Manganese(II) Oxidation with  
481 Chlorine. *Journal of Environmental Engineering* 117(3).
- 482 40. Allard S, Fouche L, Dick J, Heitz A, & von Gunten U (2013) Oxidation of  
483 manganese(II) during chlorination: role of bromide. *Environ Sci Technol*  
484 47(15):8716-8723.
- 485 41. Holmgren A (1976) Hydrogen donor system for Escherichia coli ribonucleoside-  
486 diphosphate reductase dependent upon glutathione. *Proc Natl Acad Sci U S A*  
487 73(7):2275-2279.
- 488 42. Yang X & Ma K (2010) Characterization of a thioredoxin-thioredoxin reductase  
489 system from the hyperthermophilic bacterium Thermotoga maritima. *J Bacteriol*  
490 192(5):1370-1376.
- 491 43. Sutton HC & Winterbourn CC (1989) On the participation of higher oxidation  
492 states of iron and copper in Fenton reactions. *Free Radic Biol Med* 6(1):53-60.
- 493 44. Rensing C & Grass G (2003) Escherichia coli mechanisms of copper  
494 homeostasis in a changing environment. *FEMS Microbiol Rev* 27(2-3):197-213.
- 495 45. Gunther MR, Hanna PM, Mason RP, & Cohen MS (1995) Hydroxyl radical  
496 formation from cuprous ion and hydrogen peroxide: a spin-trapping study. *Arch*  
497 *Biochem Biophys* 316(1):515-522.

- 498 46. Johnson DK, *et al.* (2015) Stabilization of Cu(I) for binding and calorimetric  
499 measurements in aqueous solution. *Dalton Trans* 44(37):16494-16505.
- 500 47. Morgenstern S, Flor R, Kessler G, & Klein B (1966) The automated determination  
501 of NAD-coupled enzymes. II. Serum lactate dehydrogenase. *Clin Chem*  
502 12(5):274-281.
- 503 48. Oikawa S & Kawanishi S (1996) Site-specific DNA damage induced by NADH in  
504 the presence of copper(II): role of active oxygen species. *Biochemistry*  
505 35(14):4584-4590.
- 506 49. Samanovic MI, Ding C, Thiele DJ, & Darwin KH (2012) Copper in microbial  
507 pathogenesis: meddling with the metal. *Cell Host Microbe* 11(2):106-115.
- 508 50. Hodgkinson V & Petris MJ (2012) Copper homeostasis at the host-pathogen  
509 interface. *J Biol Chem* 287(17):13549-13555.
- 510 51. Djoko KY & McEwan AG (2013) Antimicrobial action of copper is amplified via  
511 inhibition of heme biosynthesis. *ACS Chem Biol* 8(10):2217-2223.
- 512 52. Letelier ME, Sanchez-Jofre S, Peredo-Silva L, Cortes-Troncoso J, & Aracena-  
513 Parks P (2010) Mechanisms underlying iron and copper ions toxicity in biological  
514 systems: Pro-oxidant activity and protein-binding effects. *Chem Biol Interact*  
515 188(1):220-227.
- 516 53. Macomber L, Rensing C, & Imlay JA (2007) Intracellular copper does not  
517 catalyze the formation of oxidative DNA damage in *Escherichia coli*. *J Bacteriol*  
518 189(5):1616-1626.
- 519 54. Ladomersky E & Petris MJ (2015) Copper tolerance and virulence in bacteria.  
520 *Metallomics* 7(6):957-964.

- 521 55. Edward T. Gray RWT, Dale W. Margerum (1977) Kinetics and mechanisms of  
522 the copper-catalyzed decomposition of hypochlorite and hypobromite. Properties  
523 of a dimeric copper(III) hydroxide intermediate. *Inorg. Chem.* 16(12):3047–3055.
- 524 56. Liu C, von Gunten U, & Croue JP (2012) Enhanced bromate formation during  
525 chlorination of bromide-containing waters in the presence of CuO: catalytic  
526 disproportionation of hypobromous acid. *Environ Sci Technol* 46(20):11054-  
527 11061.
- 528 57. Church JA (1994) Kinetics of the Uncatalyzed and Cu(II) -Catalyzed  
529 Decomposition of Sodium Hypochlorite. *Ind. Eng. Chem. Res.* 33(2):239-245.
- 530 58. Lister MW (1956) Decomposition of Sodium Hypochlorite: The Uncatalyzed  
531 Reaction. *Canadian Journal of Chemistry* 34:465-478.
- 532 59. Pham AN, Xing G, Miller CJ, & Waite TD (2013) Fenton-like copper redox  
533 chemistry revisited: Hydrogen peroxide and superoxide mediation of copper-  
534 catalyzed oxidant production. *Journal of Catalysis* 301:54-64.
- 535 60. Petersen C & Moller LB (2000) Control of copper homeostasis in *Escherichia coli*  
536 by a P-type ATPase, CopA, and a MerR-like transcriptional activator, CopR.  
537 *Gene* 261(2):289-298.
- 538 61. Mealman TD, Blackburn NJ, & McEvoy MM (2012) Metal export by CusCFBA,  
539 the periplasmic Cu(I)/Ag(I) transport system of *Escherichia coli*. *Curr Top Membr*  
540 69:163-196.
- 541 62. Su CC, Long F, & Yu EW (2011) The Cus efflux system removes toxic ions via a  
542 methionine shuttle. *Protein Sci* 20(1):6-18.



- 543 63. Mateus A, *et al.* (2018) Thermal proteome profiling in bacteria: probing protein  
544 state in vivo. *Mol Syst Biol* 14(7):e8242.
- 545 64. Beveridge SJ, Garrett IR, Whitehouse MW, Vernon-Roberts B, & Brooks PM  
546 (1985) Biodistribution of <sup>64</sup>Cu in inflamed rats following administration of two  
547 anti-inflammatory copper complexes. *Agents Actions* 17(1):104-111.
- 548 65. Achard ME, *et al.* (2012) Copper redistribution in murine macrophages in  
549 response to Salmonella infection. *Biochem J* 444(1):51-57.
- 550 66. Casciaro M, *et al.* (2017) Chlorinative stress in age-related diseases: a literature  
551 review. *Immun Ageing* 14:21.
- 552 67. Dalle-Donne I, Rossi R, Colombo R, Giustarini D, & Milzani A (2006) Biomarkers  
553 of oxidative damage in human disease. *Clin Chem* 52(4):601-623.
- 554 68. Klebanoff SJ (2005) Myeloperoxidase: friend and foe. *J Leukoc Biol* 77(5):598-  
555 625.
- 556 69. Franceschi C & Campisi J (2014) Chronic inflammation (inflammaging) and its  
557 potential contribution to age-associated diseases. *J Gerontol A Biol Sci Med Sci*  
558 69 Suppl 1:S4-9.
- 559 70. Rivera-Chavez F & Baumler AJ (2015) The Pyromaniac Inside You: Salmonella  
560 Metabolism in the Host Gut. *Annu Rev Microbiol* 69:31-48.
- 561 71. Shin NR, Whon TW, & Bae JW (2015) Proteobacteria: microbial signature of  
562 dysbiosis in gut microbiota. *Trends Biotechnol* 33(9):496-503.
- 563 72. J S, EF F, & T M (1989) *Molecular Cloning: A Laboratory Manual* (Cold Spring  
564 Harbor Laboratory Press, Cold Spring Harbor, NY) 2nd Ed.

- 565 73. Letunic I & Bork P (2016) Interactive tree of life (iTOL) v3: an online tool for the  
 566 display and annotation of phylogenetic and other trees. *Nucleic Acids Res*  
 567 44(W1):W242-245.
- 568 74. Datsenko KA & Wanner BL (2000) One-step inactivation of chromosomal genes  
 569 in *Escherichia coli* K-12 using PCR products. *Proc Natl Acad Sci U S A*  
 570 97(12):6640-6645.

571

572 FIGURES

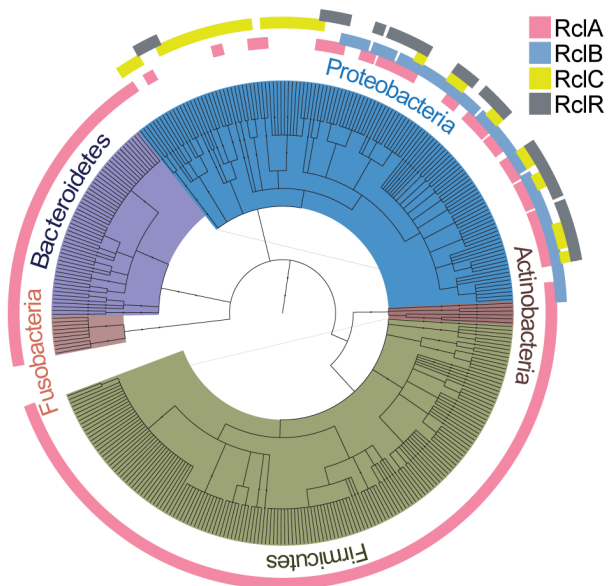

573

574 **Figure 1: RclA is widely conserved among bacteria that colonize epithelial**  
 575 **surfaces.** Phylogenetic tree made from amino acid sequence alignments of RclA (284  
 576 species), RclB (61 species), RclC, (49 species), and RclR (43 species). See SI Dataset  
 577 S1 for lists of each hit used in the phylogenetic tree. Tree graphic was made using the  
 578 interactive tree of life (73).

579

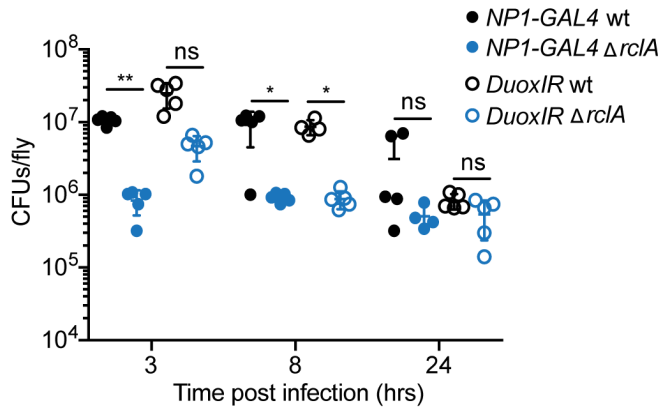

580

581 **Figure 2: RclA contributes to host colonization in the presence of Duox-mediated**

582 **oxidative stress.** *E. coli* Nissle 1917 (EcN)  $\Delta rcIA$  mutants had a significant defect in

583 their ability to colonize *D. melanogaster* compared to wild-type (wt) EcN. NP1-GAL4

584 control or DuoxIR (Duox-inhibited) *D. melanogaster* were fed either wt or  $\Delta rcIA$  EcN and

585 bacterial loads were measured (n = 4 - 5,  $\pm$  SD). Statistical analysis was performed

586 using a two-way ANOVA with Tukey's multiple comparisons test (\*\*\*\* = P < 0.0001, \*\* =

587 P < 0.01, ns = not significant).

588

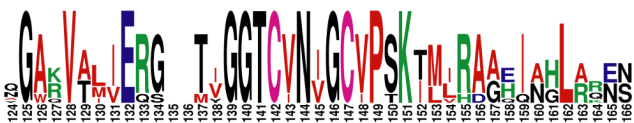

589

590 **Figure 3: RclA and Mercuric reductase (MerA) share a conserved active site.**

591 Active site consensus sequence of *E. coli* RclA and MerA amino acid sequences from

592 seven bacterial species (*Escherichia coli*, *Staphylococcus aureus*, *Salmonella enterica*,

593 *Listeria monocytogenes*, *Klebsiella pneumoniae*, *Serratia marcescens*). Alignment was

594 made using CLUSTAL O (1.2.4) and graphic was made with WEBLOGO.

595

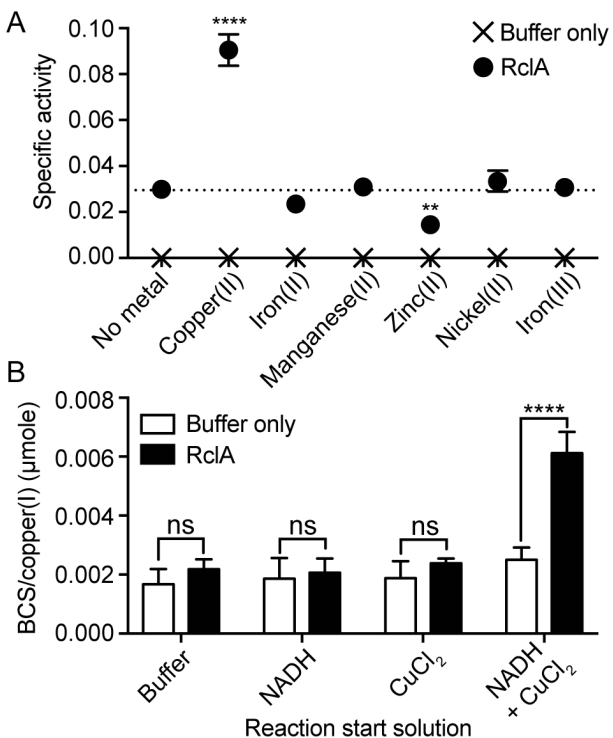

596

597 **Figure 4: RclA is Cu(II) reductase.** (A) RclA specific activity (SA) increases in the  
 598 presence of Cu(II). Specific activity ( $\mu\text{mole NAD}^+ \text{min}^{-1} \text{mg}^{-1} \text{RclA}$ ) of RclA was assayed  
 599 by measuring NADH oxidation over time spectrophotometrically ( $n = 6, \pm \text{SD}$ ).

600 Differences in SA in the presence of each metal were analyzed using a two-way  
 601 ANOVA with Dunnet's multiple comparison test using the no metal reaction as the

602 control (\*\*\*\*=  $P < 0.0001$ , \*\* =  $P < 0.01$ ). (B) Cu(I) accumulates after the RclA and  
 603 NADH/copper (II) reaction, as measured by BCS/Cu(I)-complex absorption. RclA

604 reactions were started with the indicated solutions and carried out as described in A ( $n =$   
 605 6 for each reaction type,  $\pm \text{SD}$ ). Differences in the amount of BCS/Cu(I) complex

606 between the buffer only and RclA reactions were analyzed using a two-way ANOVA  
 607 with Sidak's multiple comparison test (\*\*\*\*=  $P < 0.0001$ , ns = not significant).

608

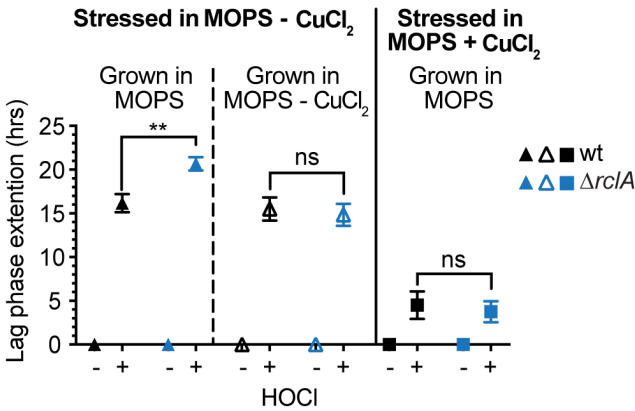

609

610 **Figure 5: Extracellular  $CuCl_2$  protects both wild-type and  $\Delta rcIA$  *E. coli* against**  
 611 **HOCl and *rcIA* is required to resist the combination of HOCl and intracellular Cu.**

612 Comparing LPE of wild-type (wt) and  $\Delta rcIA$  *E. coli* strains in various combinations of  
 613 HOCl (132  $\mu M$ ) and  $CuCl_2$  (n = 3,  $\pm$  SD). Media conditions are as follows:

614 “stressed/grown in MOPS” = background copper in the media (9 nM  $CuCl_2$ ), “stressed in  
 615 MOPS +  $CuCl_2$ ” = background copper in the media (9 nM  $CuCl_2$ ) + 10  $\mu M$   $CuCl_2$  added  
 616 (copper was added to media and mixed with HOCl before resuspending cells in the  
 617 mixture), “stressed/grown in MOPS –  $CuCl_2$ ” = media treated with a metal chelator, then  
 618 supplemented with all metals usually present in MOPS excluding copper. Differences  
 619 between strain LPE were determined by comparing LPE for each  $CuCl_2$  concentration  
 620 at each growth condition between strains (two-way ANOVA with Tukey’s multiple  
 621 comparison test; \*\*\* = P < 0.001, \*\* = P < 0.01, ns = not significant).

622

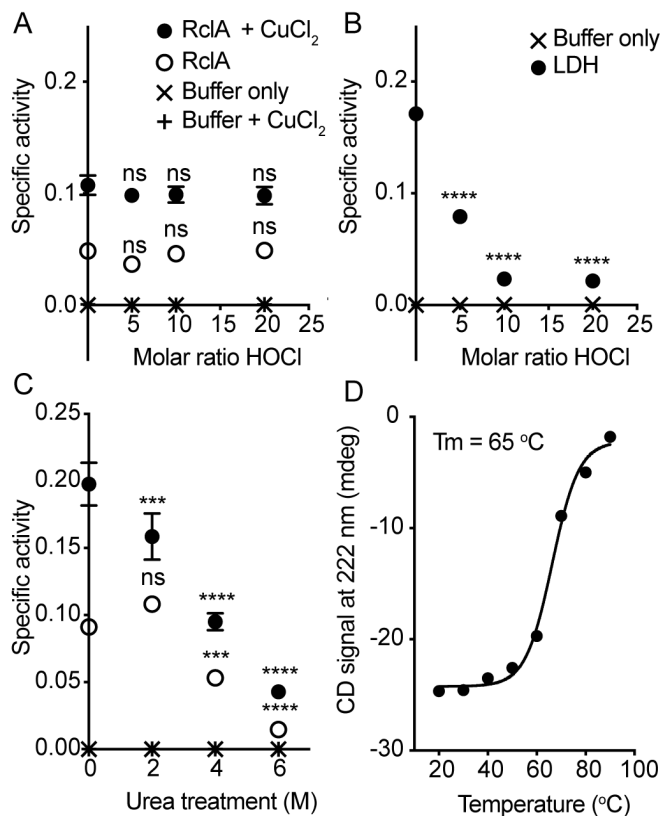

623

624 **Figure 6. RclA is resistant to denaturation.** (A) SA of RclA ( $\mu\text{moles NAD}^+/\text{min}^{-1} \text{ mg}$

625 RclA $^{-1}$ ), with and without CuCl<sub>2</sub>, after being treated with the indicated molar ratios of

626 HOCl to RclA. (B) SA of lactate dehydrogenase (LDH) ( $\mu\text{moles NAD}^+/\text{min}^{-1} \text{ U LDH}^{-1}$ )

627 used as control reactions for HOCl degradation of enzymatic activity. (C) RclA with and

628 without CuCl<sub>2</sub> (200  $\mu\text{M}$  final) after being treated with the indicated concentrations of

629 urea. (D) CD signals at 222 nm (mdeg) (raw data shown in Supp Figure 6) at each

630 temperature used to determine the  $T_m$  of RclA (65 °C). Differences in SA ( $n = 6, \pm \text{SD}$ )

631 after treatment were analyzed using a two-way ANOVA with Sidak's multiple

632 comparison test for HOCl treatment (A and B) and Dunnet's test using the buffer only

633 reaction as the control for the urea treated samples (C) (\*\*\*\* =  $P < 0.0001$ , \* =  $P < 0.05$

634 ns = not significant).

635

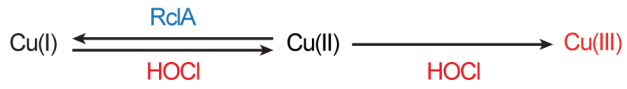

637 **Figure 7. Proposed model for how RclA protects *E. coli* against combined HOCl**  
638 **and copper stress.** The Cu(II) reductase activity of RclA may be important in reversing  
639 the oxidation of copper by HOCl, preventing the production of toxic Cu(III).
